# Supplementary material
Source: publisher figshare collection journal article supplement (https://sage.figshare.com/ndownloader/files/18725180)
Supplement: Supplementary file 1 [file 18725180]

**Supplementary Material: Drowning was classified into accidental, assault and self-inflicted.**

**Circumstances of accidental drowning was determined based on the external cause of injury codes in ICD -9 and ICD-10 codes**

| Diagnosis                                                 | ICD-9 code                                    | ICD-10 code                |
|-----------------------------------------------------------|-----------------------------------------------|----------------------------|
| <b>Drowning and non-fatal submersion</b>                  | <b>994.1</b>                                  | <b>T75.1</b>               |
| <b>1.Accidental drowning and submersion</b>               |                                               |                            |
| a) Water sports                                           | E830, E832, E910.0,<br>E910.1. E910.2, E910.3 | V90, V92                   |
| b) Pool/other                                             | E910.8                                        | W67, W68, W69,<br>W70, W73 |
| c) Bathtub                                                | E910.4                                        | W65, W66                   |
| d) Unspecified                                            | E910.9                                        | W74                        |
| <b>2.Assault by drowning and submersion</b>               | E964                                          | X92                        |
| <b>3.Intentional self-harm by drowning and submersion</b> | E954                                          | X71                        |
